# Supplementary material for: Identification of a Musashi2 translocation as a novel oncogene in myeloid leukemia
Source: eLife. 2026 Jan 7;13:RP93645. doi: 10.7554/eLife.93645 (PMC12779265; doi:10.7554/eLife.93645)
Supplement: Supplementary file 1. [file elife-93645-supp1.xlsx]

## Sheet: Sheet1
Supplementary Table 1: Selected MSI2 fusions and resultant cancers
ChimerDB 4.0: an updated and expanded database of fusion genes
https://www.kobic.re.kr/chimerdb/chimerseq
Tumor Type	Abbreviation	Fusion Pair
Bladder urothelial carcinoma	BLCA	MSI2-BCAS3
Bladder urothelial carcinoma	BLCA	MSI2-YPEL2
Breast invasive carcinoma	BRCA	ATP6V0A1-MSI2
Breast invasive carcinoma	BRCA	KSR1-MSI2
Breast invasive carcinoma	BRCA	MSI2-CA10
Breast invasive carcinoma	BRCA	MSI2-DHX40
Breast invasive carcinoma	BRCA	MSI2-EFCAB5
Breast invasive carcinoma	BRCA	MSI2-PCTP
Breast invasive carcinoma	BRCA	MSI2-PRR15L
Breast invasive carcinoma	BRCA	MSI2-RAD51C
Breast invasive carcinoma	BRCA	MSI2-TEX2
Breast invasive carcinoma	BRCA	MSI2-TOB1
Breast invasive carcinoma	BRCA	MSI2-WIPF2
Breast invasive carcinoma	BRCA	NR2F2-MSI2
Breast invasive carcinoma	BRCA	PXDNL-MSI2
Breast invasive carcinoma	BRCA	SDF2-MSI2
Breast invasive carcinoma	BRCA	STAU2-MSI2
Breast invasive carcinoma	BRCA	STXBP4-MSI2
Breast invasive carcinoma	BRCA	TM2D2-MSI2
Breast invasive carcinoma	BRCA	TRIM25-MSI2
Head and neck squamous cell carcinoma	HNSC	MSI2-UTP18
Liver hepatocellular carcinoma	LIHC	TRIM37-MSI2
Lung adenocarcinoma	LUAD	MSI2-NPEPPS
Lung squamous cell carcinoma	LUSC	MSI2-AKAP1
Lung squamous cell carcinoma	LUSC	MSI2-ARL17B
Lung squamous cell carcinoma	LUSC	MSI2-ICAM2
Lung squamous cell carcinoma	LUSC	MSI2-SYNPO2
Lung squamous cell carcinoma	LUSC	SYNGR2-MSI2
Ovarian serous cystadenocarcinoma	OV	MGRN1-MSI2
Pancreatic adenocarcinoma	PAAD	DHX8-MSI2
Prostate adenocarcinoma	PRAD	MSI2-CCDC178
Prostate adenocarcinoma	PRAD	MSI2-SMYD3
Skin cutaneous melanoma	SKCM	KCTD15-MSI2
Stomach adenocarcinoma	STAD	MSI2-RNF135
Uterine carcinosarcoma	UCS	MSI2-CISD3
