# Supplementary material for: Identification of a Musashi2 translocation as a novel oncogene in myeloid leukemia
Source: eLife. 2026 Jan 7;13:RP93645. doi: 10.7554/eLife.93645 (PMC12779265; doi:10.7554/eLife.93645)
Supplement: Supplementary file 2. [file elife-93645-supp2.xlsx]

## Sheet: Sheet1
Supplementary Table 2: List of primer sequences.
qRT-PCR PRIMERS
Gene	Primer Forward (5’-3’)	Primer Reverse (5’-3’)
β2M	ACCGGCCTGTATGCTATCCAG	AATGTGAGGCGGGTGGAACTG
BCR-ABL	TGCTGACCAACTCGTGTGTG	CCATTCCCCATTGTGATTATAGC
Msi2	AGATCCCACAACGAAACGCT	ACCATCTTAGGTTGCGCTCG
Actb	TCGAGTCGCGTCCACC	GGGAGCATCGTCGCCC
Polrmt	TGGGCGCAAAAGCTAGAGG	GTAAAGGGTCCAGAACTCCTG
Tfam	GGCCCATCTTGCATTCTAGGG	CAGGCAACGGCTCTATATTGAAG
Tfb2m	GGCCCATCTTGCATTCTAGGG	GCAACGGCTCTATATTGAAGTCA
Mrpl12	GCCACCGAAGGAGTGAAGC	GGAGCGTAAGGCTGGCAAT
Nrf1	GGACATGGAGCAAGTTTGGC	TCCAGCGAGGAGATCGATGA
mt-Atp8	TGCCACAACTAGATACATCAACA	AGGTGCCAGTGGGAATGTTT
mt-Co2	ACCTGGTGAACTACGACTGC	GGACTGCTCATGAGTGGAGG
mt-Co3	CAAGGCCACCACACTCCTATT	GTGAGCAGCCTCCTAGATCA
mt-Cytb	GGCTACGTCCTTCCATGAGG	AGGTGAACGATTGCTAGGGC
mt-Nd1	TCCGAGCATCTTATCCACGC	GTATGGTGGTACTCCCGCTG
mt-Nd4	CCTCAGACCCCCTATCCACA	GTTTGGTTCCCTCATCGGGT
