# Supplementary material for: Identification of a Musashi2 translocation as a novel oncogene in myeloid leukemia
Source: eLife. 2026 Jan 7;13:RP93645. doi: 10.7554/eLife.93645 (PMC12779265; doi:10.7554/eLife.93645)
Supplement: Supplementary file 3. [file elife-93645-supp3.xlsx]

## Sheet: Sheet1
Supplementary Table 3: List of antibodies used
Immunofluorescence
Antibody	Clone	Vendor	Dilution	Catalog number
chicken anti-GFP	polyclonal	Abcam	1.5:1000	ab13970
rabbit anti-FLAG	M2	Cell Signaling Technologies	1:800	14793S
rabbit anti-Msi2	EP1305Y	Abcam	1:200	ab76148
MitoTracker Deep Red FM	-	Invitrogen	1:10000	M22426
DAPI	-	Invitrogen	1:10000	D1306
AlexaFluor 488 goat anti-chicken	-	Invitrogen	1:1000	A11039
AlexaFluor 647 goat anti-mouse	-	Invitrogen	1:1000	A21235
AlexaFluor 568 goat anti-rabbit	-	Invitrogen	1:1000	A11011
Histology
Antibody	Clone	Vendor	Dilution	Catalog number
Giemsa Stain	-	Sigma	1:20	GS500
May-Grunwald Stain	-	Sigma	-	MG500
Flow cytometry
KLS sorting:
Antibody	Fluorophore	Clone	Vendor	Dilution	Catalog number
CD16/CD32	-	2.4G2	BD Bioscience	1:100	553141
CD3	APC	17A2	Invitrogen	2:100	17-0032-82
CD4	APC	GK1.5	Invitrogen	2:100	17-0041-83
CD8	APC	53-6.7	Invitrogen	2:100	17-0081-82
CD19	APC	MB19-1	Invitrogen	2:100	17-0191-82
B220	APC	RA3-6B2	Invitrogen	2:100	17-0452-82
CD11b	APC	M1/70	Invitrogen	2:100	17-0112-83
Gr1	APC	RB6-8C5	Invitrogen	2:100	17-5931-82
Ter119	APC	TER-119	Invitrogen	2:100	17-5921-82
ckit	BV421	2B8	Biolegend	3:100	105828
Sca1	PE/Cy7	D7	Invitrogen	3:100	25-5981-82
Primary bcCML sorting:
Antibody	Fluorophore	Clone	Vendor	Dilution	Catalog number
CD16/CD32	-	2.4G2	BD Bioscience	1:100	553141
NGFR	BV421	C40-1457	BD Bioscience	3uL/1M cells	562562
CD2	APC	RPA-2.10	Invitrogen	3uL/1M cells	17-0029-42
CD3	APC	17A2	Invitrogen	3uL/1M cells	17-0032-82
CD4	APC	GK1.5	Invitrogen	3uL/1M cells	17-0041-83
CD8	APC	53-6.7	Invitrogen	3uL/1M cells	17-0081-82
CD19	APC	MB19-1	Invitrogen	3uL/1M cells	17-0191-82
B220	APC	RA3-6B2	Invitrogen	3uL/1M cells	17-0452-82
CD11b	APC	M1/70	Invitrogen	3uL/1M cells	17-0112-83
Gr1	APC	RB6-8C5	Invitrogen	3uL/1M cells	17-5931-82
Ter119	APC	TER-119	Invitrogen	3uL/1M cells	17-5921-82
