# Supplementary material for: Identification of a Musashi2 translocation as a novel oncogene in myeloid leukemia
Source: eLife. 2026 Jan 7;13:RP93645. doi: 10.7554/eLife.93645 (PMC12779265; doi:10.7554/eLife.93645)
Supplement: Supplementary file 4. [file elife-93645-supp4.xlsx]

## Sheet: Figure 1
Source Data. Source data for all numerical values reported in Figures and Figure Supplements
Figure 1c
BCR-ABL	BCR-ABL/MSI2-HOXA9
44	54
42	62
41	66
Figure 1d
BCR-ABL	BCR-ABL/MSI2-HOXA9
4	7
5	10
6	10
Figure 1e
BCR-ABL	BCR-ABL/MSI2-HOXA9
8.22	26.6
10.1	39.4
7.14	42.2
2.57	30
3.61	18.7
Figure 1f
BCR-ABL	BCR-ABL/NUP98-HOXA9	BCR-ABL/MSI2-HOXA9
63	88	75
62	90	82
63	96	89
67	83	78
Figure 1g
BCR-ABL	BCR-ABL/NUP98-HOXA9	BCR-ABL/MSI2-HOXA9
19	11	13
16	5	8
15	4	6
13	7	10
Figure 1h
BCR-ABL	BCR-ABL/NUP98-HOXA9	BCR-ABL/MSI2-HOXA9
25	1	12
28	2	11
17	0	12
22	8	5
Figure 1i
BCR-ABL	BCR-ABL/NUP98-HOXA9	BCR-ABL/MSI2-HOXA9
2	0	0
1	2	0
1	0	0
2	2	0
Figure 1j
Day	BCR-ABL	BCR-ABL/MSI2-HOXA9
15		1	1= event
17		1	0= censored case
17		1
18	1	1
19		1
20		1
20	1
21		1
32		1
34	1
34	1
40	1
42	0
48	1
54	1

## Sheet: Figure 2
Figure 2b
BCR-ABL	BCR-ABL/ΔRRM1	BCR-ABL/ΔRRM2	BCR-ABL/ΔHOXA9	BCR-ABL/MSI2-HOXA9
30	34	33	63	74
33	31	38	64	77
34	29	33	58	69
Figure 2c
BCR-ABL	BCR-ABL/MSI2-HOXA9	BCR-ABL/MSI2	BCR-ABL/ΔRRM1	BCR-ABL/ΔHOXA9
8	33	12	22	26
7	36	10	19	29
9	31	13	20	28
Figure 2d
BCR-ABL	BCR-ABL/MSI2-HOXA9	BCR-ABL/MSI2	BCR-ABL/ΔRRM1	BCR-ABL/ΔHOXA9
7	24	6	10	14
9	24	9	14	16
8	26	9	9	15
Figure 2e
BCR-ABL	BCR-ABL/ΔRRM1	BCR-ABL/MSI2-HOXA9
11.6	0.71	30.4
2.23	3.98	24.08
10.92	9.62	15.4
5.52	13.7	23.3
6.2	3.12
9.52	4.66
	0.093
Figure 2f
BCR-ABL	BCR-ABL/MSI2-HOXA9	BCR-ABL/ΔRRM1	BCR-ABL/ΔRRM2	BCR-ABL/ΔHOXA9
63	75	54	76	75
62	82	58	76	74
63	89	57	73	77
67	78	61	71	71
Figure 2g
BCR-ABL	BCR-ABL/MSI2-HOXA9	BCR-ABL/ΔRRM1	BCR-ABL/ΔRRM2	BCR-ABL/ΔHOXA9
19	13	25	14	9
16	8	17	9	6
15	6	19	13	7
13	10	17	11	11
Figure 2h
BCR-ABL	BCR-ABL/MSI2-HOXA9	BCR-ABL/ΔRRM1	BCR-ABL/ΔRRM2	BCR-ABL/ΔHOXA9
25	12	24	9	17
28	11	27	15	20
17	12	22	14	16
22	5	22	18	18
Figure 2i
BCR-ABL	BCR-ABL/MSI2-HOXA9	BCR-ABL/ΔRRM1	BCR-ABL/ΔRRM2	BCR-ABL/ΔHOXA9
2	0	3	1	0
1	0	0	0	0
1	0	2	0	0
2	0	0	0	0
Figure 2j
Day	BCR-ABL	BCR-ABL/ΔRRM1	BCR-ABL/MSI2-HOXA9
22			1	1= event
24			1	0= censored case
28			1
30		1
32	1
32	1	1
34			1
37	1
39		1
46		1
50	1
55	1
58		1
66	0	0
66		0

## Sheet: Figure 3
Figure 3e
Target	Sample	Cq	Expression	SEM
B2m	BCR-ABL	21.7434
B2m	BCR-ABL	21.7408
B2m	BCR-ABL	21.8305
mt-Atp8	BCR-ABL	17.2217	1	0.0593505		-4.54983	23.4226	21.5071	1.08906	0.0550625
mt-Atp8	BCR-ABL	17.3283				-4.44332	21.7557		1.01156
mt-Atp8	BCR-ABL	17.4978				-4.27374	19.343		0.899375
mt-Co2	BCR-ABL	17.0573	1	0.0310987		-4.71432	26.2513	26.0088	1.00932	0.0232782
mt-Co2	BCR-ABL	17.1358				-4.63576	24.8601		0.955836
mt-Co2	BCR-ABL	17.0212				-4.75033	26.9149		1.03484
mt-Co3	BCR-ABL	17.03	1	0.0452692		-4.74156	26.7518	24.9595	1.07181	0.0404343
mt-Co3	BCR-ABL	17.2318				-4.53974	23.2594		0.931884
mt-Co3	BCR-ABL	17.1354				-4.63619	24.8674		0.99631
mt-Cytb	BCR-ABL	18.1493	1	0.0247082		-3.62231	12.3147	12.4231	0.991275	0.0139724
mt-Cytb	BCR-ABL	18.1638				-3.60782	12.1917		0.981371
mt-Cytb	BCR-ABL	18.0977				-3.67388	12.7629		1.02735
mt-Nd1	BCR-ABL	17.963	1	0.0242786		-3.80858	14.0119	13.8873	1.00897	0.0130403
mt-Nd1	BCR-ABL	17.952				-3.81962	14.1195		1.01672
mt-Nd1	BCR-ABL	18.0134				-3.75814	13.5305		0.974306
mt-Nd4	BCR-ABL	18.2325	1	0.153112		-3.53909	11.6244	10.3342	1.12485	0.138938
mt-Nd4	BCR-ABL	18.871				-2.90059	7.46734		0.722584
mt-Nd4	BCR-ABL	18.1974				-3.57421	11.9109		1.15257
B2m	BCR-ABL/MSI2-HOXA9 -1	24.8582
B2m	BCR-ABL/MSI2-HOXA9 -1	24.8047
B2m	BCR-ABL/MSI2-HOXA9 -1	24.8391
mt-Atp8	BCR-ABL/MSI2-HOXA9 -1	17.7807	5.54323	0.32026		-7.05325	132.813	6.1753	5.54426	0.321377
mt-Atp8	BCR-ABL/MSI2-HOXA9 -1	17.9919				-6.84211	114.731	5.33455
mt-Atp8	BCR-ABL/MSI2-HOXA9 -1	18.0503				-6.78371	110.179	5.12293
mt-Co2	BCR-ABL/MSI2-HOXA9 -1	17.381	5.9014	0.44934		-7.45302	175.22	6.73695	5.9318	0.447752
mt-Co2	BCR-ABL/MSI2-HOXA9 -1	17.58				-7.25397	152.638	5.86872
mt-Co2	BCR-ABL/MSI2-HOXA9 -1	17.7574				-7.07659	134.979	5.18975
mt-Co3	BCR-ABL/MSI2-HOXA9 -1	17.5762	6.12567	0.19592		-7.25779	153.043	6.13163	6.1212	0.183734
mt-Co3	BCR-ABL/MSI2-HOXA9 -1	17.5067				-7.32726	160.592	6.4341
mt-Co3	BCR-ABL/MSI2-HOXA9 -1	17.6569				-7.17704	144.712	5.79788
mt-Cytb	BCR-ABL/MSI2-HOXA9 -1	18.5748	6.06708	0.12528		-6.25913	76.5924	6.16532	6.06777	0.105631
mt-Cytb	BCR-ABL/MSI2-HOXA9 -1	18.6489				-6.18504	72.7584	5.85671
mt-Cytb	BCR-ABL/MSI2-HOXA9 -1	18.5711				-6.26286	76.7905	6.18127
mt-Nd1	BCR-ABL/MSI2-HOXA9 -1	18.2462	6.42671	0.28037		-6.58774	96.1848	6.9261	6.43711	0.272572
mt-Nd1	BCR-ABL/MSI2-HOXA9 -1	18.3599				-6.47406	88.8965	6.40129
mt-Nd1	BCR-ABL/MSI2-HOXA9 -1	18.4572				-6.37679	83.1006	5.98393
mt-Nd4	BCR-ABL/MSI2-HOXA9 -1	18.695	6.58263	0.21093		-6.13893	70.4695	6.81905	6.44682	0.195894
mt-Nd4	BCR-ABL/MSI2-HOXA9 -1	18.8429				-5.99108	63.6053	6.15483
mt-Nd4	BCR-ABL/MSI2-HOXA9 -1	18.7941				-6.03988	65.7938	6.3666
B2m	BCR-ABL/MSI2-HOXA9 -2	24.2469
B2m	BCR-ABL/MSI2-HOXA9 -2	24.4084
B2m	BCR-ABL/MSI2-HOXA9 -2	24.2266
mt-Atp8	BCR-ABL/MSI2-HOXA9 -2	15.9884	15.5504	0.75693		-8.30558	316.394	14.7112	15.5146	0.430075
mt-Atp8	BCR-ABL/MSI2-HOXA9 -2	15.8509				-8.44309	348.035	16.1823
mt-Atp8	BCR-ABL/MSI2-HOXA9 -2	15.8991				-8.39486	336.592	15.6503
mt-Co2	BCR-ABL/MSI2-HOXA9 -2	15.7727	13.6515	0.80386		-8.52129	367.422	14.1268	13.6693	0.579664
mt-Co2	BCR-ABL/MSI2-HOXA9 -2	15.7488				-8.54522	373.566	14.3631
mt-Co2	BCR-ABL/MSI2-HOXA9 -2	15.9471				-8.34686	325.579	12.518
mt-Co3	BCR-ABL/MSI2-HOXA9 -2	15.8915	13.476	0.57908		-8.4025	338.379	13.5571	13.4575	0.214451
mt-Co3	BCR-ABL/MSI2-HOXA9 -2	15.8691				-8.42487	343.667	13.769
mt-Co3	BCR-ABL/MSI2-HOXA9 -2	15.9469				-8.3471	325.632	13.0464
mt-Cytb	BCR-ABL/MSI2-HOXA9 -2	16.4475	18.5367	1.03697		-7.84645	230.154	18.5263	18.5617	0.728104
mt-Cytb	BCR-ABL/MSI2-HOXA9 -2	16.3487				-7.9453	246.475	19.8401
mt-Cytb	BCR-ABL/MSI2-HOXA9 -2	16.5448				-7.7492	215.151	17.3186
mt-Nd1	BCR-ABL/MSI2-HOXA9 -2	16.4456	17.4067	1.09864		-7.84844	230.471	16.5958	17.4461	0.873347
mt-Nd1	BCR-ABL/MSI2-HOXA9 -2	16.2358				-8.05817	266.534	19.1926
mt-Nd1	BCR-ABL/MSI2-HOXA9 -2	16.4495				-7.84445	229.834	16.55
mt-Nd4	BCR-ABL/MSI2-HOXA9 -2	16.5905	20.261	0.84948		-7.70353	208.446	20.1704	19.8282	0.255673
mt-Nd4	BCR-ABL/MSI2-HOXA9 -2	16.6037				-7.69028	206.541	19.9861
mt-Nd4	BCR-ABL/MSI2-HOXA9 -2	16.652				-7.64198	199.74	19.3281

## Sheet: Figure 4
Figure 4b
Time (min)	BCR-ABL/GFP			BCR-ABL/MSI2-HOXA9
1.56877	147.507	140.676	149.815	183.418	186.087	186.485
8.1176	140.228	133.748	143.109	172.156	175.289	176.617
14.6677	137.49	132.939	142.98	168.399	171.598	171.101
21.282	58.7527	61.6358	66.5099	78.6703	81.4452	79.9804
27.8274	62.5873	66.7213	71.2893	83.4744	86.5094	85.5822
34.3739	64.9661	70.7875	75.8135	87.3762	90.6157	89.5061
40.9972	126.771	152.89	166.228	230.883	279.12	235.118
47.5441	123.364	137.03	158.641	196.859	193.35	205.999
54.0881	134.663	140.965	168.26	186.169	198.317	207.698
60.7152	316.572	389.067	442.612	332.66	390.549	340.536
67.2645	321.389	395.333	454.504	353.053	400.47	350.838
73.8116	320.506	391.884	449.346	344.173	391.78	346.654
80.4388	21.572	25.582	21.3202	28.4501	28.9515	26.7564
86.9944	28.8938	35.6166	31.4992	36.53	37.6172	34.5592
93.5439	27.5525	35.0321	31.4249	35.425	37.6256	33.8739
Figure 4c
BCR-ABL/GFP	BCR-ABL/MSI2-HOXA9
115.918	139.949
107.357	142.647
121.66	144.345
Figure 4d
BCR-ABL/GFP	BCR-ABL/MSI2-HOXA9
78.7374	89.7286
71.3028	90.153
76.47	91.1209
Figure 4e
BCR-ABL/GFP	BCR-ABL/MSI2-HOXA9
113.091	168.409
115.383	164.399
146.94	179.242
Figure 4f
Time (min)	BCR-ABL/GFP			BCR-ABL/MSI2-HOXA9
1.56877	15.2394	14.3168	15.7651	28.7172	30.3416	31.3258
8.1176	14.6601	13.8668	14.9267	27.0476	28.821	29.8357
14.6677	14.8748	13.6478	14.6026	26.1151	27.8599	28.8749
21.282	20.0032	20.3597	21.6836	38.5769	41.1582	43.3311
27.8274	20.8052	21.3804	22.518	38.4777	40.9365	43.2914
34.3739	21.4331	21.7718	22.8857	38.6932	41.2083	43.7563
40.9972	20.4639	23.5552	23.8836	45.4603	47.2067	41.7875
47.5441	21.0517	23.596	23.4006	44.376	44.1812	41.2972
54.0881	21.2087	23.7969	23.4497	43.6987	43.8725	41.4588
60.7152	43.1561	48.1386	50.5521	57.335	69.9575	64.6852
67.2645	42.7182	47.8158	49.8939	57.6705	69.8983	64.4183
73.8116	42.3426	47.2624	49.074	56.4722	68.9759	62.6003
80.4388	18.3472	29.4758	22.0303	31.8609	43.8462	36.4862
86.9944	18.9595	29.0972	21.5214	31.4464	43.942	35.0885
93.5439	19.3221	29.3283	21.4167	31.649	43.5263	34.6688
Figure 4g
BCR-ABL/GFP	BCR-ABL/MSI2-HOXA9
15.2394	28.7172
14.3168	30.3416
15.7651	31.3258
Figure 4h
BCR-ABL/GFP	BCR-ABL/MSI2-HOXA9
6.19373	9.97605
7.455	10.8667
7.1206	12.4305
Figure 4i
BCR-ABL/GFP	BCR-ABL/MSI2-HOXA9
21.4331	38.6932
21.7718	41.2084
22.8857	43.7563
Figure 4j
BCR-ABL/GFP		BCR-ABL/MSI2-HOXA9
ECAR	OCR	ECAR	OCR
15.2394	147.507	28.7172	183.418
14.3168	140.676	30.3416	186.087
15.7651	149.815	31.3258	186.485
Figure 4i
BCR-ABL/GFP	BCR-ABL/MSI2-HOXA9
3.7502	3.67298
3.78633	3.71741
3.80291	3.66358

## Sheet: Figure 5
Figure 5a
Target	Sample	Cq	Expression	SEM
B2m	BCR-ABL	21.7434
B2m	BCR-ABL	21.7408
B2m	BCR-ABL	21.8305
Polrmt	BCR-ABL	33.1164	1	0.17483		11.3448	0.000384478	0.000335197	1.14702	0.156575
Polrmt	BCR-ABL	33.8558				12.0842	0.000230294		0.687041
Polrmt	BCR-ABL	33.0928				11.3212	0.000390818		1.16594
Tfam	BCR-ABL	28.0923	1	0.0402		6.32069	0.0125108	0.0118427	1.05641	0.0344211
Tfam	BCR-ABL	28.2644				6.49278	0.011104		0.937623
Tfam	BCR-ABL	28.1629				6.39128	0.0119133		1.00596
Tfb2m	BCR-ABL	28.2595	1	0.07323		6.48794	0.0111413	0.0102588	1.08602	0.067931
Tfb2m	BCR-ABL	28.3108				6.53926	0.0107519		1.04806
Tfb2m	BCR-ABL	28.5863				6.81469	0.0088833		0.865917
Nrf1	BCR-ABL	25.3148	1	0.02668		3.54321	0.0857802	0.0860672	0.996665	0.017203
Nrf1	BCR-ABL	25.2655				3.4939	0.0887632		1.03132
Nrf1	BCR-ABL	25.3509				3.57935	0.0836583		0.972011
Mrpl12	BCR-ABL	25.5452	1	0.02974		3.77363	0.0731178	0.0757942	0.964689	0.0216653
Mrpl12	BCR-ABL	25.4993				3.72769	0.075484		0.995907
Mrpl12	BCR-ABL	25.4376				3.66601	0.0787808		1.0394
B2m	BCR-ABL/MSI2-HOXA9	24.2469
B2m	BCR-ABL/MSI2-HOXA9	24.4084
B2m	BCR-ABL/MSI2-HOXA9	24.2266
Polrmt	BCR-ABL/MSI2-HOXA9	33.4992	4.96471	0.094862		9.20521	0.00169417	5.05424	4.93453	0.0843853
Polrmt	BCR-ABL/MSI2-HOXA9	33.5822				9.28822	0.00159944	4.77165
Polrmt	BCR-ABL/MSI2-HOXA9	33.5212				9.22722	0.00166851	4.97771
Tfam	BCR-ABL/MSI2-HOXA9	30.744	1.07915	0.10897		6.44995	0.0114386	0.965875	1.08743	0.104842
Tfam	BCR-ABL/MSI2-HOXA9	30.6935				6.3995	0.0118457	1.00025
Tfam	BCR-ABL/MSI2-HOXA9	30.3196				6.0256	0.0153502	1.29618
Tfb2m	BCR-ABL/MSI2-HOXA9	30.1731	1.47812	0.11628		5.87914	0.0169904	1.65617	1.47777	0.100213
Tfb2m	BCR-ABL/MSI2-HOXA9	30.3475				6.05346	0.0150566	1.46767
Tfb2m	BCR-ABL/MSI2-HOXA9	30.512				6.21801	0.0134336	1.30946
Nrf1	BCR-ABL/MSI2-HOXA9	27.5241	1.3894	0.09743		3.23011	0.106571	1.23823	1.39353	0.0780355
Nrf1	BCR-ABL/MSI2-HOXA9	27.2887				2.99471	0.125459	1.45768
Nrf1	BCR-ABL/MSI2-HOXA9	27.2623				2.96826	0.127781	1.48466
Mrpl12	BCR-ABL/MSI2-HOXA9	28.7203	1.07717	0.03781		4.42634	0.0465092	0.613625	0.614286	0.0378691
Mrpl12	BCR-ABL/MSI2-HOXA9	28.8808				4.58682	0.0416131	0.549028
Mrpl12	BCR-ABL/MSI2-HOXA9	28.5717				4.27773	0.0515556	0.680205
Figure 5c
MSI2	MSI2-HOXA9
0.313	0.21
0.175	0.113
0.301	0.014
0.381	0.079
0.286	0.066
0.34	0.225
0.464	0.064
0.157	0.038
0.262	0.011
0.226	0.093
0.137	0.139
	0.01
	0.043
Figure 5d
MSI2	MSI2-HOXA9
0.72	0.17
0.638	0.11
0.599	0.056
0.865	0.231
0.591	0.233
0.524	0.495
0.658	0.078
0.239	0.117
0.513	0.017
0.705	0.124
0.535	0.43
	0.027
	0.17

## Sheet: Figure 1 - figure supplement 1
Figure 1-figure supplement 1d
BCR-ABL	BCR-ABL/ΔRRM1	BCR-ABL/ΔRRM2	BCR-ABL/ΔHOXA9	BCR-ABL/MSI2-HOXA9
4	8	10	10	12
4	7	8	7	13
6	11	10	5	13

## Sheet: Figure 3 - figure supplement 1
Figure 3-figure supplement 1a
BCR-ABL/GFP		BCR-ABL/MSI2-HOXA9
PC1	PC2	PC1	PC2
40	550	850	-470
240	150	-1200	-260
Figure 3-figure supplement 1b
BCR-ABL/GFP	BCR-ABL/MSI2-HOXA9
67.925	64.1153
66.4167	63.2002
62.8557	63.1272
Figure 3-figure supplement 1c
BCR-ABL/GFP	BCR-ABL/MSI2-HOXA9
21.572	28.4501
25.582	28.9515
21.3202	26.7564
Figure 3-figure supplement 1d
BCR-ABL/GFP	BCR-ABL/MSI2-HOXA9
299.817	324.603
369.751	371.519
433.184	324.081
Figure 3-figure supplement 1e
BCR-ABL/GFP	BCR-ABL/MSI2-HOXA9
37.1807	50.2202
36.0538	52.4937
45.1897	53.2241
Figure 3-figure supplement 1f
Day	BCR-ABL/GFP		BCR-ABL/MSI2-HOXA9
1	3195.51	3162.8	428.94	429.27
3	439.53	662.21	80.19	73.19
Figure 3-figure supplement 1g
Day	BCR-ABL/GFP		BCR-ABL/MSI2-HOXA9
1	5153.13	4770.55	3043.3	2199.14
3	1293.06	1295.81	2280.13	1949.46
Figure 3-figure supplement 1h
Day	BCR-ABL/GFP		BCR-ABL/MSI2-HOXA9
1	1.6126	1.5083	7.0949	5.123
2	3.0431	5.2852	10.5395	11.1214
3	2.9419	1.9568	28.4357	26.6361
